# Supplementary material for: Different agglomeration properties of PC61BM and PC71BM in photovoltaic inks – a spin-echo SANS study
Source: PubMed Central journal article supplement — RSC Adv. 2020 Jan 29;10(8):4512–20. doi: 10.1039/c9ra08019h (PMC9049156; doi:10.1039/c9ra08019h), 2020-01-29
Supplement: RA-010-C9RA08019H-s001.pdf [file RA-010-C9RA08019H-s001.pdf]

## SUPPORTING INFORMATION

### **Different Agglomeration Properties of PC<sub>61</sub>BM and PC<sub>71</sub>BM in Photovoltaic Inks – A Spin-Echo SANS Study**

Gabriel Bernardo<sup>1,\*</sup>, Manuel Melle-Franco<sup>2</sup>, Adam Washington<sup>3</sup>, Robert Dalglish<sup>3</sup>,  
Fankang Li<sup>4</sup>, Adélio Mendes<sup>1</sup>, Steven R. Parnell<sup>5,\*</sup>

<sup>1</sup>LEPABE - Laboratory for Process Engineering, Environment, Biotechnology and  
Energy, Faculty of Engineering, University of Porto, Rua Dr. Roberto Frias, 4200-465  
Porto, Portugal

<sup>2</sup>CICECO—Aveiro Institute of Materials, Department of Chemistry, University of  
Aveiro, 3810-193 Aveiro, Portugal

<sup>3</sup>ISIS Pulsed Neutron and Muon Source, STFC, Rutherford Appleton Laboratory,  
Harwell, Oxon, OX11 0QX, UK

<sup>4</sup>Neutron Sciences Directorate, Oak Ridge National Laboratory, Oak Ridge, TN 37830,  
USA

<sup>5</sup>Faculty of Applied Sciences, Delft University of Technology, Mekelweg 15, 2629 JB  
Delft, Netherlands

\*Corresponding authors: [gbernardo@fe.up.pt](mailto:gbernardo@fe.up.pt); [S.R.Parnell@tudelft.nl](mailto:S.R.Parnell@tudelft.nl)

## DAB model applied to SESANS

The structural length scale probed ( $z$ ) is a function of neutron wavelength ( $\lambda$ ), magnetic field strength ( $B$ ) and the inclination angle of the magnets ( $\theta$ ).

$$z = cBL\lambda^2 \cot \theta \quad (1)$$

where  $c$  is a constant,  $L$  is the separation between the magnets. Hence using a pulsed source with multiple wavelengths allows us to collect and probe a wide range of length scales simultaneously due to the  $\lambda^2$  dependence. This also allows us to measure quickly and opens up the possibilities of kinetics studies. In SESANS the measured polarisation is given by;

$$P(z) = P_s/P_0 = \exp[\Sigma_t(G(z)-1)] \quad (2)$$

Where  $P_s$  and  $P_0$  are the sample and empty polarisations respectively. The measured correlation function ( $G(z)$ ) is a projection of the autocorrelation function  $\gamma(r)$  of the density distribution of the sample along the encoding direction of SESANS.  $\Sigma_t$  is the fraction of neutrons that are scattered once and is given by;

$$\Sigma_t = \xi(\Delta\rho)^2 \phi(1-\phi)\lambda^2 t \quad (3)$$

,where  $t$  is the sample thickness,  $\Delta\rho$  is the difference in scattering length densities between the two phases as given in Table 1 (Supplementary Information) and  $\xi$  is given by;

$$\xi = 2 \int_0^\infty \gamma(r) dr \quad (4)$$

In this case of the DAB model,  $\gamma(r)$  is given by;

$$\gamma(r) = \exp(-r/a) \quad (5)$$

,where  $a$  is the average correlation length of a system with random distributed holes and solid and hence  $\xi = 2a$  for DAB model.  $G(z)$  can be obtained from the Abel transform of the autocorrelation function ( $\gamma(r)$ ), which is given by;

$$G(z) = \left(\frac{z}{a}\right) K_1\left(\frac{z}{a}\right) \quad (6)$$

, where  $K_1\left[\frac{z}{a}\right]$  is the first order of the modified Bessel function of the second kind.

Hence in the DAB model there are only two parameters needed to describe the fit: a length scale ( $a$ ) and the saturation value  $\Sigma_t$ . For a known scattering length density difference, equation (3) can be solved and the roots of this solution yield the two volume fractions of the solvent and aggregate fractions given by;

$$\phi_{agg} = \frac{1 + \sqrt{1 - 4 \left( \frac{\Sigma_t}{2a(\Delta\rho)^2 \lambda^2 t} \right)}}{2} \quad (7)$$

and the solvent volume fraction  $\phi_{sol}=1-\phi_{agg}$  for a binary system. In order to convert this to solubility we use the following simple equation:

$$Solubility = C_{solution} - (\phi_{agg} d_{PCBM}) \quad (8)$$

, where  $C_{solution}$  is the total concentration of PC<sub>61</sub>BM in solution (30, 60 or 90 mg.mL<sup>-1</sup>), and  $d_{PC61BM}$  is the density of PC<sub>61</sub>BM which we consider as 1500 mg.mL<sup>-1</sup>.

|                          | Density<br>$\text{g}\cdot\text{cm}^{-3}$ | SLD ( $\text{\AA}^{-2}$ ) |
|--------------------------|------------------------------------------|---------------------------|
| <b>PC<sub>61</sub>BM</b> | 1.5 <sup>a</sup>                         | $4.34\times 10^{-6}$      |
| <b>PC<sub>71</sub>BM</b> | 1.5 <sup>a</sup>                         | $4.42\times 10^{-6}$      |
| <b>Chloroform</b>        | 1.49                                     | $2.36\times 10^{-6}$      |
| <b>Toluene</b>           | 0.87                                     | $0.94\times 10^{-6}$      |
| <b>Chlorobenzene</b>     | 1.11                                     | $1.82\times 10^{-6}$      |
| <b>DIO</b>               | 1.84                                     | $0.12\times 10^{-6}$      |

**Table S1.** Densities and neutron scattering length densities of the fullerenes and solvents used in this study. <sup>a</sup>[Kiel, J. W., Eberle, A. P. R. & Mackay, M. E. Nanoparticle Agglomeration in Polymer-Based Solar Cells. *Physical Review Letters* 105, 168701 (2010)]

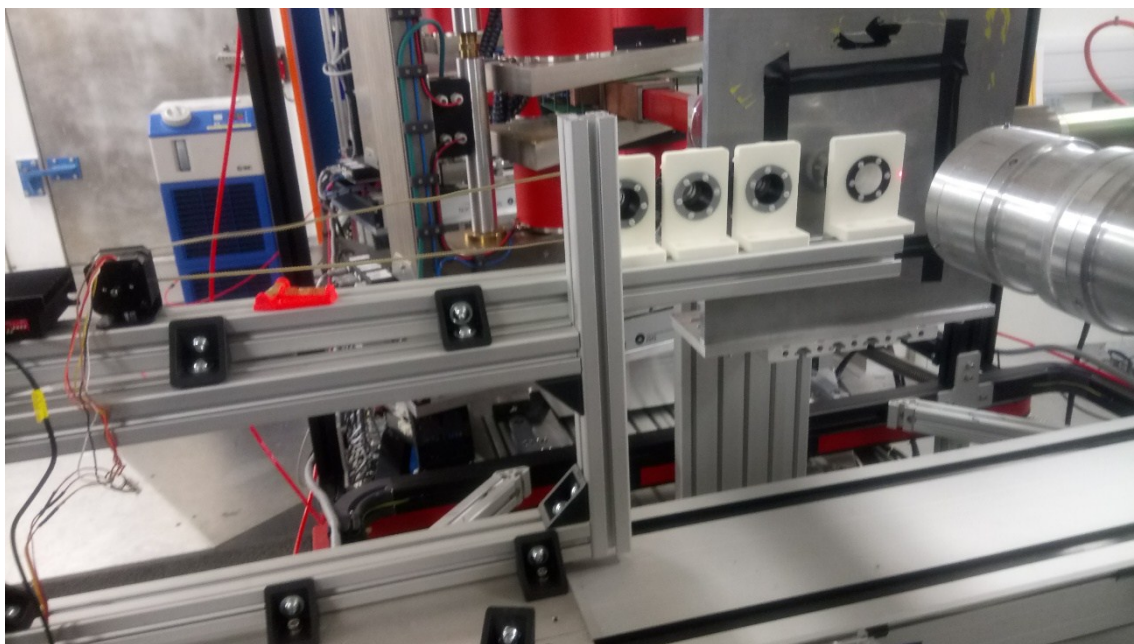

**Figure S1.** Rotation apparatus, with cell holders made of Teflon, placed in the beamline

|               | PC <sub>61</sub> BM                                                                 | PC <sub>71</sub> BM                                                                  |
|---------------|-------------------------------------------------------------------------------------|--------------------------------------------------------------------------------------|
| Chloroform    | 30 mg·mL <sup>-1</sup>                                                              | 90 mg·mL <sup>-1</sup>                                                               |
|               | 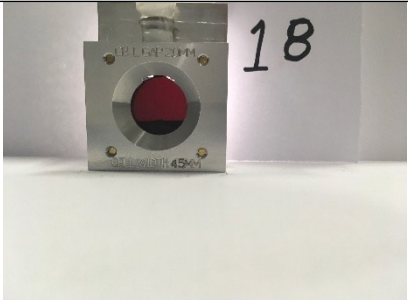   | 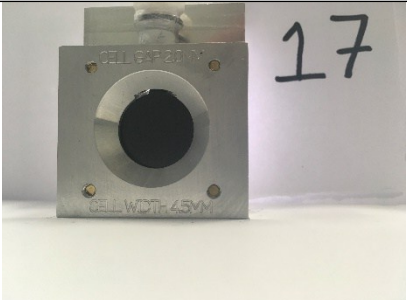   |
| Toluene       | 60 mg·mL <sup>-1</sup>                                                              | 90 mg·mL <sup>-1</sup>                                                               |
|               | 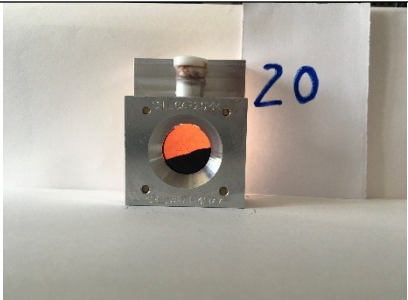   | 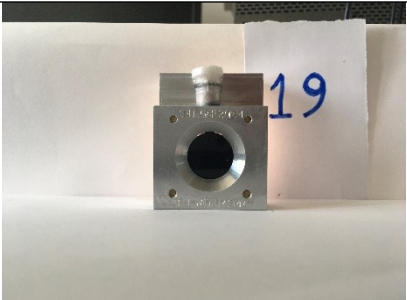   |
| Chlorobenzene | 90 mg·mL <sup>-1</sup>                                                              | 90 mg·mL <sup>-1</sup>                                                               |
|               | 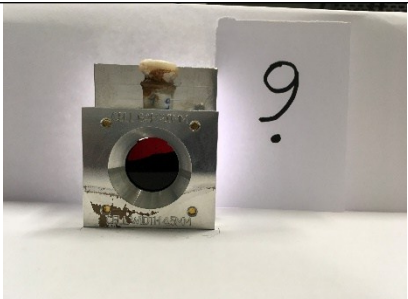 | 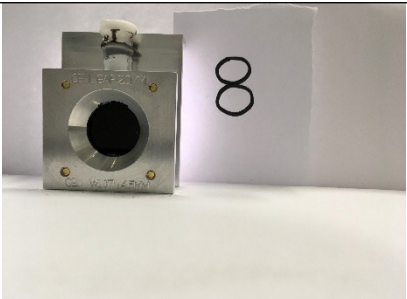 |
| DIO           | 90 mg·mL <sup>-1</sup>                                                              | 90 mg·mL <sup>-1</sup>                                                               |
|               | 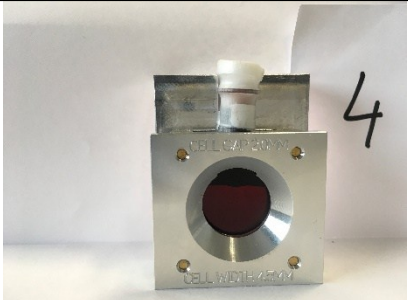 | 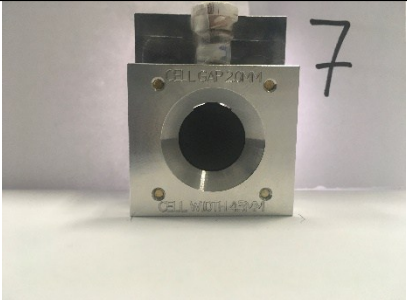 |

**Figure S2.** Photos of solutions after ~48 h at rest. We note that, due to the high fullerene concentrations ( $\geq 30$  mg·mL<sup>-1</sup>) and cell path lengths (1 mm) used, at the time of the SESANS measurements all the solutions were completely opaque (and macroscopically homogeneous). After ~48 hours at rest (photos shown), all the PC<sub>71</sub>BM solutions remained completely opaque and macroscopically homogeneous (including those with 90 mg·mL<sup>-1</sup>) but most of the PC<sub>61</sub>BM solutions had suffered large phase segregation.

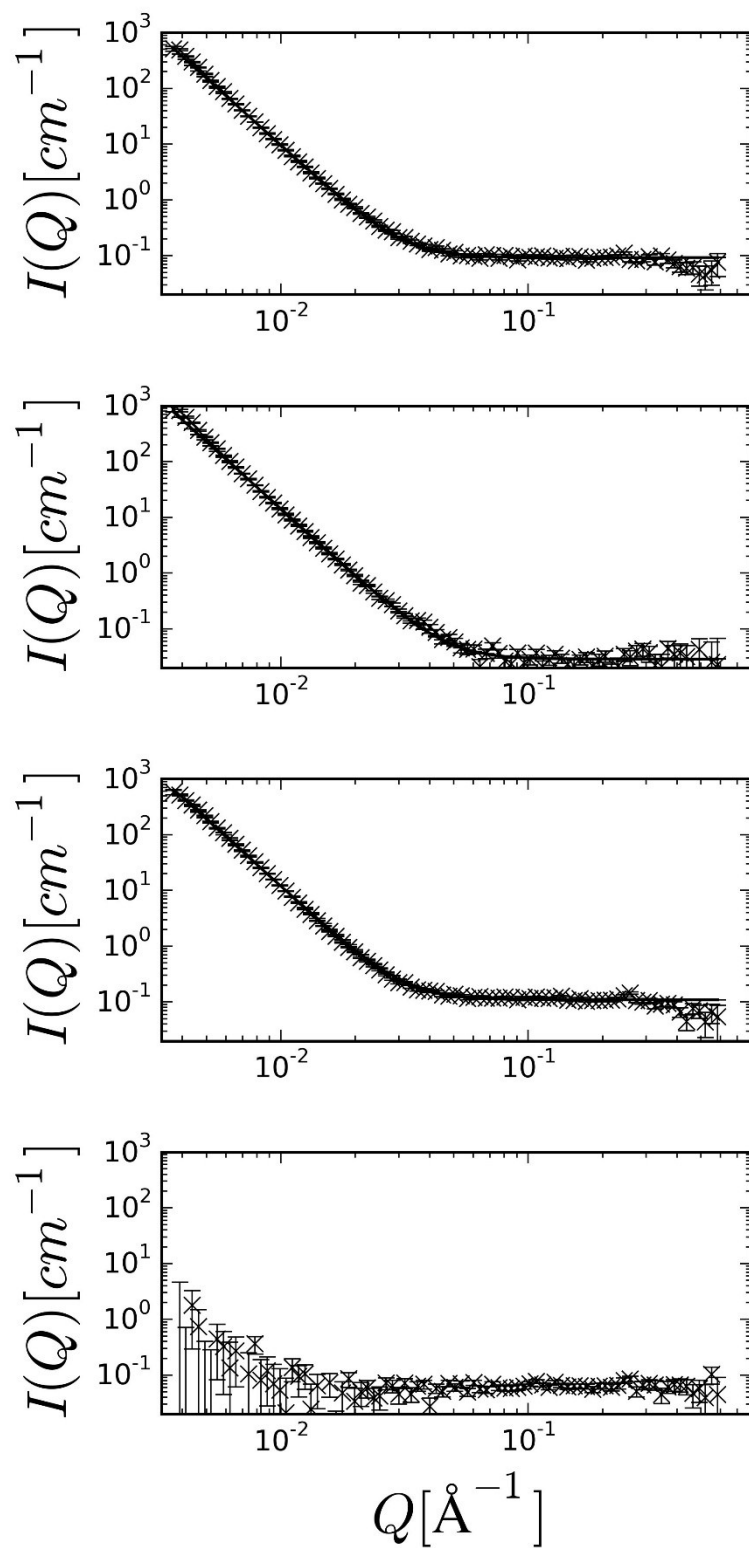

**Figure S3.** SANS results of (top to bottom): PC<sub>61</sub>BM in DIO (90 mg·mL<sup>-1</sup>); PC<sub>61</sub>BM in Chlorobenzene (90 mg·mL<sup>-1</sup>); PC<sub>71</sub>BM in Toluene (90 mg·mL<sup>-1</sup>) and PC<sub>61</sub>BM in Chlorobenzene (30 mg·mL<sup>-1</sup>).
